# Supplementary material
Source: Royal Society of Chemistry journal article supplement (doi:10.1039/d6cp00029k)
Supplement: d6cp00029k1.pdf [file d6cp00029k1.pdf]

## **Electronic Supporting Information for:**

# Machine learning the quantum topology of chemical bonds

Michał Michalski <sup>1)</sup>, Sławomir Berski <sup>2)</sup>

<sup>1)</sup> Institute for Research in Biomedicine (IRB Barcelona), Barcelona Institute of Science and Technology, 08028, Barcelona, Spain.

<sup>2)</sup> Faculty of Chemistry, University of Wrocław, 50383, Wrocław, Poland.

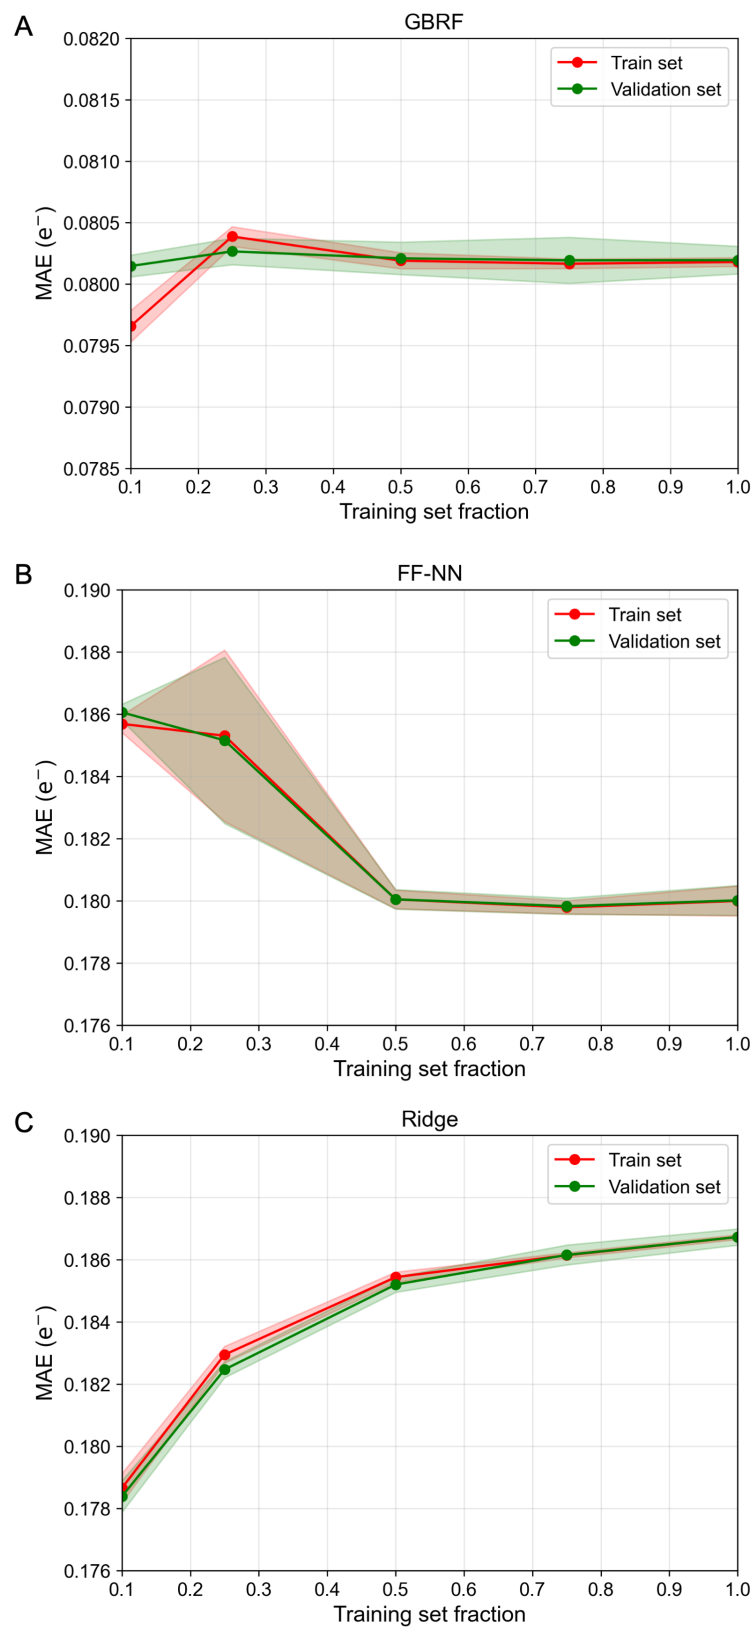

**Figure S1.** Learning curves showing mean absolute error (MAE) as a function of training set fraction for (a) Gradient Boosting Random Forest regression (GBRF), (b) Feed-Forward Neural Network (FF-NN), and (c) Ridge regression (Ridge) models. Red and green lines correspond to training and validation sets, respectively. Shaded areas indicate standard deviation across five-fold cross-validation.

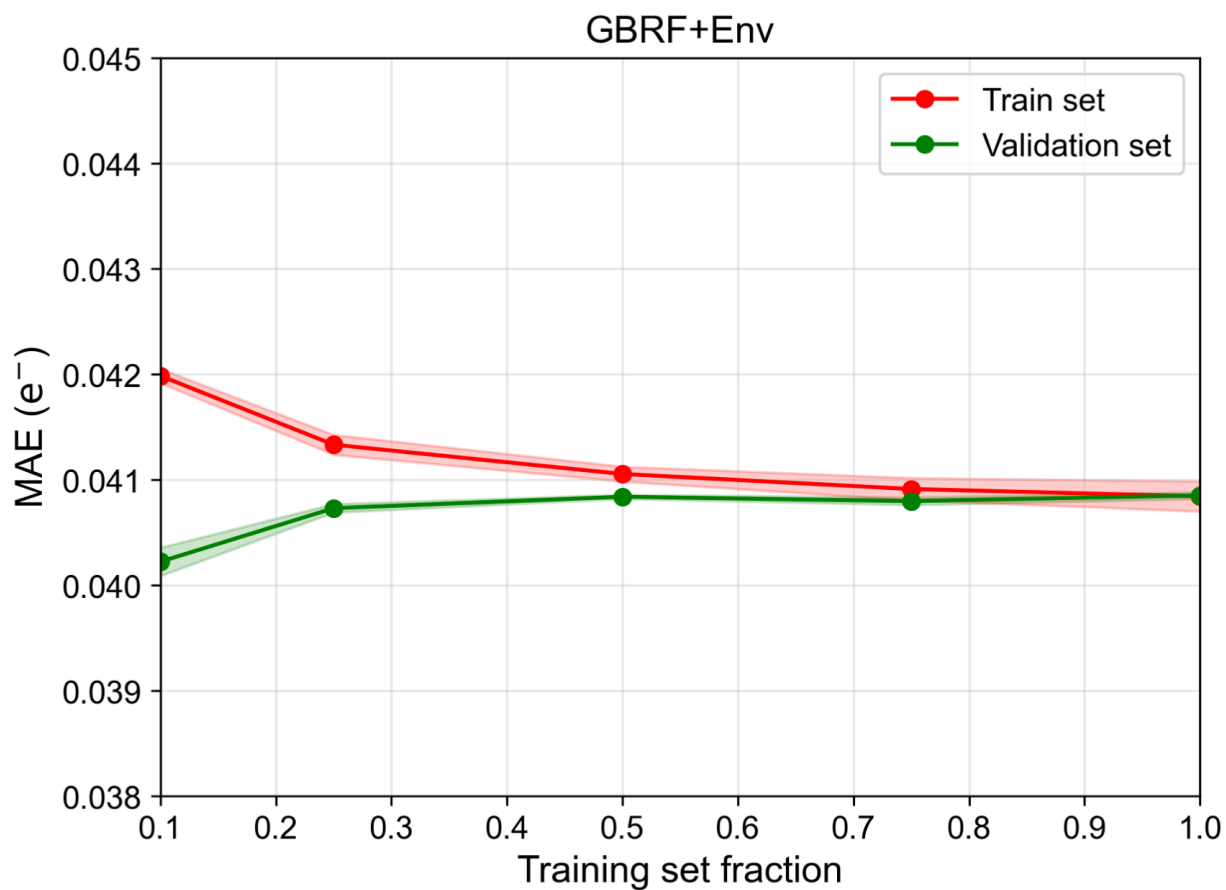

**Figure S2.** Learning curve for the Gradient Boosting Random Forest model with explicit environmental features (GBRF+Env), showing mean absolute error (MAE) as a function of training set fraction for the training (red) and validation (green) sets. Shaded areas indicate the standard deviation across five-fold cross-validation.
